# Supplementary material
Source: MDPI journal article supplement (https://www.mdpi.com/1424-2818/15/3/449)
Supplement: s1 [file s1]

## Supplementary material

**Table S1:** Coordinates and depth for both sampling stations (a) along the coastal Po River Pro delta and (b) in the Gulf of Trieste along with the sewage discharge. Indication of the transect to which the station belongs as well as the distance from the sewage pipelines are reported.

| Station | Latitude     | Longitude    | Depth (m) | Transect         | Distance from the main duct (m) |
|---------|--------------|--------------|-----------|------------------|---------------------------------|
| C1      | 44°59'34.80" | 12°33'21.60" | 12.5      | north, nearshore |                                 |
| C3      | 44°58'4.75"  | 12°34'15.58" | 8.1       | north, nearshore |                                 |
| C8      | 44°55'44.37" | 12°33'28.79" | 11.3      | north, nearshore |                                 |
| C10     | 44°53'27.60" | 12°32'16.80" | 14.7      | south, nearshore |                                 |
| C12     | 44°52'1.20"  | 12°31'8.40"  | 14        | south, nearshore |                                 |
| C16     | 44°47'47.71" | 12°27'22.59" | 14        | south, nearshore |                                 |
| C19     | 44°45'49.03" | 12°27'42.52" | 19        | south, offshore  |                                 |
| C22     | 44°45'3.96"  | 12°30'20.99" | 24.5      | south, offshore  |                                 |
| C23     | 44°42'29.46" | 12°33'18.74" | 28        | south, offshore  |                                 |
| 0D      | 45°38'36.30" | 13°40'51.70" | 22.6      | distal           | 5                               |
| 0P      | 45°38'28.53" | 13°41'36.67" | 22        | proximal         | 5                               |
| 25FD    | 45°38'36.23" | 13°40'51.79" | 22.4      | distal           | 25                              |
| -25D    | 45°38'35.66" | 13°40'51.86" | 22.5      | distal           | 25                              |
| 25D     | 45°38'36.95" | 13°40'51.53" | 22.3      | distal           | 25                              |
| 1P      | 45°38'31.58" | 13°41'35.94" | 21.9      | proximal         | 100                             |
| 1D      | 45°38'39.75" | 13°40'50.93" | 23        | distal           | 100                             |
| 1FD     | 45°38'36.07" | 13°40'47.26" | 22.7      | distal           | 100                             |
| -1D     | 45°38'33.68" | 13°40'52.34" | 22.3      | distal           | 100                             |
| -1P     | 45°38'25.43" | 13°41'37.43" | 22        | proximal         | 100                             |
| 2P      | 45°38'34.56" | 13°41'35.17" | 22        | proximal         | 200                             |
| 2D      | 45°38'42.95" | 13°40'50.02" | 23.5      | distal           | 200                             |
| -2D     | 45°38'30.34" | 13°40'53.17" | 21.9      | distal           | 200                             |
| -2P     | 45°38'22.40" | 13°41'38.19" | 21.4      | proximal         | 200                             |
| 2FD     | 45°38'35.51" | 13°40'43.10" | 23.1      | distal           | 200                             |

**Table S2:** Bioturbation Potential (BP<sub>i</sub>) [69] and Irrigation Potential (IP<sub>i</sub>) [37] categorical scores of taxa observed in both sampling areas. Ri (Reworking) scores: 1-epifauna, 2-superficial modifiers, 3-upward and downward conveyors, 4-biodiffusers, 5-regenerators; Mi (Mobility) scores: 1-organism that lives in fixed tubes, 2-organism with limited movement, 3-movements through the sediment matrix, 4-free movements via burrow types. BTi (Burrow type) scores: 1-infauna with internal irrigation (e.g. siphons), 2-open irrigation (U- or Y- shaped burrows), 3-blind ended irrigation (blind-ended burrows, no burrows systems); FTi (Feeding type) scores: 1-surface filter feeder, 2-predator, 3-surface deposit feeder, 4-subsurface deposit feeder; IDi (Injection depth) scores: 0-epibiont; 1-depth from 0 to 2 cm, 2-depth from 2 to 5 cm, 3-depth from 5 to 10 cm and 4-depth over 10 cm. From [37], the calculation of FTi was modified by dividing deposit feeder habit in surface and subsurface deposit feeder modalities, with different categorical scores.

|                                                               | BP <sub>i</sub> |    | IP <sub>i</sub> |     |     |
|---------------------------------------------------------------|-----------------|----|-----------------|-----|-----|
|                                                               | Ri              | Mi | BTi             | FTi | IDi |
| <i>Abra alba</i> (W. Wood, 1802)                              | 2               | 2  | 1               | 3   | 1   |
| <i>Abra longicallus</i> (Scacchi, 1835)                       | 2               | 2  | 1               | 3   | 1   |
| <i>Abra prismatica</i> (Montagu, 1808)                        | 2               | 2  | 1               | 3   | 1   |
| <i>Abra tenuis</i> (Montagu, 1803)                            | 2               | 2  | 1               | 3   | 1   |
| <i>Abyssoninoe Hibernica</i> (McIntosh, 1903)                 | 4               | 3  | 3               | 2   | 3   |
| <i>Acanthocardia paucicostata</i> (G. B. Sowerby II, 1834)    | 2               | 2  | 1               | 1   | 2   |
| <i>Aclis ascaris</i> (W. Turton, 1819)                        | 1               | 2  | 1               | 1   | 1   |
| <i>Aclis minor</i> (T. Brown, 1827)                           | 1               | 2  | 1               | 1   | 1   |
| <i>Acrocorda brachiata</i> (Montagu, 1804)                    | 4               | 3  | 2               | 4   | 3   |
| <i>Aequipecten opercularis</i> (Linnaeus, 1758)               | 2               | 3  | 1               | 1   | 0   |
| <i>Ampelisca diadema</i> (Costa, 1853)                        | 2               | 1  | 2               | 3   | 1   |
| <i>Ampelisca gibba</i> (G.O. Sars, 1883)                      | 2               | 1  | 2               | 3   | 1   |
| <i>Ampelisca intermedia</i> (Bellan-Santini & Diviacco, 1990) | 2               | 1  | 2               | 3   | 1   |
| <i>Ampelisca ledoyeri</i> (Bellan-Santini & Kaim-Malka, 1977) | 2               | 1  | 2               | 3   | 1   |
| <i>Ampelisca sarsi</i> (Chevreux, 1888)                       | 2               | 1  | 2               | 3   | 1   |
| <i>Ampelisca spinipes</i> (Boeck, 1861)                       | 2               | 1  | 2               | 3   | 1   |
| <i>Ampelisca tenuicornis</i> (Liljeborg, 1856)                | 2               | 1  | 2               | 3   | 1   |
| <i>Ampelisca typica</i> (Spence Bate, 1856)                   | 2               | 1  | 2               | 3   | 1   |
| <i>Ampharete acutifrons</i> (Grube, 1860)                     | 3               | 2  | 2               | 3   | 2   |
| <i>Amphibalanus eburneus</i> (Gould, 1841)                    | 1               | 1  | 1               | 1   | 1   |
| <i>Amphibalanus improvisus</i> (Darwin, 1854)                 | 1               | 1  | 1               | 1   | 1   |
| <i>Amphipholis squamata</i> (Delle Chiaje, 1828)              | 4               | 3  | 2               | 4   | 3   |
| <i>Amphiura chiajei</i> (Forbes, 1843)                        | 4               | 3  | 2               | 4   | 3   |
| <i>Amphiura filiformis</i> (O.F. Müller, 1776)                | 4               | 3  | 2               | 4   | 3   |
| <i>Anadara corbuloides</i> (Monterosato, 1881)                | 4               | 3  | 1               | 1   | 1   |
| <i>Anadara gibbosa</i> (Reeve, 1844)                          | 4               | 3  | 1               | 1   | 1   |

|                                                                  |   |   |      |      |      |
|------------------------------------------------------------------|---|---|------|------|------|
| <i>Anadara inaequivalvis</i> (Bruguère, 1789)                    | 4 | 3 | 1    | 1    | 1    |
| <i>Anapagurus adriaticus</i> (García-Gómez, 1994)                | 1 | 4 | 1    | 3    | 0    |
| <i>Anomia ephippium</i> (Linnaeus, 1758)                         | 1 | 1 | 3    | 1    | 0    |
| <i>Antalis inaequicostata</i> (Dautzenberg, 1891)                | 3 | 2 | 3    | 4    | n.a. |
| <i>Aonides oxycephala</i> (Sars, 1862)                           | 3 | 2 | 1    | 3    | 1    |
| <i>Aphelochaeta filiformis</i> (Keferstein, 1862)                | 2 | 2 | 3    | 3    | 2    |
| <i>Aponuphis bilineata</i> (Baird, 1870)                         | 2 | 3 | 3    | 4    | n.a. |
| <i>Aponuphis brementi</i> (Fauvel, 1916)                         | 2 | 3 | 3    | 3    | n.a. |
| <i>Aporrhais pespelecani</i> (Linnaeus, 1758)                    | 2 | 3 | 3    | 1    | 1    |
| <i>Arcopella balaustina</i> (Linnaeus, 1758)                     | 4 | 3 | 2    | 3    | 3    |
| <i>Arcuatula senhousia</i> (W. H. Benson, 1842)                  | 4 | 3 | 3    | 1    | 0    |
| <i>Aricidea (acmira) assimilis</i> (Tebble, 1959)                | 2 | 3 | 3    | 3    | 1    |
| <i>Aricidea claudiae</i> (Laubier, 1967)                         | 2 | 3 | 2    | 3    | 1    |
| <i>Aricidea Strelzovi</i> (Hartmann-Schröder & Rosenfeldt, 1990) | 2 | 3 | 3    | 3    | 1    |
| <i>Astropecten irregularis</i> (Pennant, 1777)                   | 2 | 3 | 1    | 2    | 1    |
| <i>Athanas nitescens</i> (Leach, 1814)                           | 2 | 2 | 1    | 2    | n.a. |
| <i>Atrina fragilis</i> (Pennant, 1777)                           | 4 | 3 | 3    | 1    | 0    |
| <i>Azorinus chamasolen</i> (da Costa, 1778)                      | 2 | 2 | 3    | 1    | n.a. |
| <i>Balanus trigonus</i> (Darwin, 1854)                           | 1 | 1 | 1    | 1    | 2    |
| <i>Bela fuscata</i> (Deshayes, 1835)                             | 1 | 2 | 1    | 3    | n.a. |
| <i>Bolinus brandaris</i> (Linnaeus, 1758)                        | 1 | 2 | 1    | 3    | n.a. |
| <i>Bradabyssa villosa</i> (Rathke, 1843)                         | 3 | 2 | 3    | 3    | n.a. |
| <i>Calyptraea chiliensis</i> (Lesson, 1831)                      | 1 | 2 | 3    | 1    | 1    |
| <i>Capitella capitata</i> (Fabricius, 1780)                      | 3 | 2 | 2    | 4    | 2    |
| <i>Ceratonereis costae</i> (Grube, 1840)                         | 4 | 3 | 3    | 2    | 4    |
| <i>Chaetopterus variopedatus</i> (Renier, 1804)                  | 3 | 1 | 2    | 4    | 4    |
| <i>Chaetozone caputesocis</i> (Saint-Joseph, 1894)               | 2 | 2 | 3    | 3    | 2    |
| <i>Chaetozone carpenteri</i> (McIntosh, 1911)                    | 2 | 2 | 3    | 3    | 2    |
| <i>Chaetozone gibber</i> (Woodham & Chambers, 1994)              | 2 | 2 | 3    | 3    | 2    |
| <i>Chamelea gallina</i> (Linnaeus, 1758)                         | 2 | 2 | 1    | 1    | 3    |
| <i>Chondrochelia savignyi</i> (Kroyer, 1842)                     | 2 | 1 | n.a. | n.a. | n.a. |
| <i>Coracuta obliquata</i> (Chaster, 1897)                        | 4 | 3 | 2    | 1    | n.a. |
| <i>Cylichna cylindracea</i> (Pennant, 1777)                      | 2 | 3 | 3    | 2    | 2    |
| <i>Dasybranchus caducus</i> (Grube, 1846)                        | 3 | 4 | 3    | 4    | 2    |
| <i>Deflexilodes acutipes</i> (Ledoyer, 1983)                     | 2 | 3 | 3    | 2    | 0    |
| <i>Dexamine spinosa</i> (Montagu, 1813)                          | 2 | 3 | 1    | 3    | 1    |
| <i>Diodora graeca</i> (Linnaeus, 1758)                           | 1 | 2 | 3    | 2    | 1    |
| <i>Diplocirrus glaucus</i> (Malmgren, 1867)                      | 3 | 2 | 3    | 3    | n.a. |
| <i>Dosinia lupinus</i> (Linnaeus, 1758)                          | 2 | 2 | 1    | 1    | 3    |
| <i>Epitonium celesti</i> (Aradas, 1854)                          | 2 | 2 | 1    | 2    | n.a. |
| <i>Epitonium clathrus</i> (Linnaeus, 1758)                       | 2 | 2 | 1    | 2    | n.a. |
| <i>Eriphia verrucosa</i> (Forskål, 1775)                         | 5 | 4 | 3    | 2    | 1    |
| <i>Ethusa mascarone</i> (Herbst, 1785)                           | 2 | 1 | 3    | 2    | 1    |
| <i>Eualus cranchii</i> (Leach, 1817)                             | 2 | 4 | 1    | 2    | 1    |

|                                                                                   |   |   |   |      |      |
|-----------------------------------------------------------------------------------|---|---|---|------|------|
| <i>Euclymene lombricoides</i> (Quatrefages, 1866)                                 | 3 | 1 | 3 | 4    | 3    |
| <i>Euclymene oerstedii</i> (Claparède, 1863)                                      | 3 | 1 | 3 | 4    | 3    |
| <i>Euclymene palermitana</i> (Grube, 1840)                                        | 3 | 1 | 3 | 4    | 3    |
| <i>Eunice vittata</i> (Delle Chiaje, 1828)                                        | 4 | 3 | 3 | 2    | n.a. |
| <i>Euspira nitida</i> (Donovan, 1803)                                             | 2 | 3 | 1 | 2    | 1    |
| <i>Galathowenia oculata</i> (Zachs, 1923)                                         | 2 | 1 | 3 | 3    | 1    |
| <i>Gallardoneris iberica</i> (Martins, Carrera-Parra, Quintino & Rodrigues, 2012) | 2 | 3 | 3 | 2    | 3    |
| <i>Gari fervensis</i> (Gmelin, 1791)                                              | 2 | 2 | 2 | 3    | n.a. |
| <i>Glycera Rouxii</i> (Audouin & Milne Edwards, 1833)                             | 4 | 3 | 2 | 2    | 4    |
| <i>Glycera tridactyla</i> (Schmarda, 1861)                                        | 4 | 3 | 2 | 2    | 4    |
| <i>Glycera unicornis</i> (Lamarck, 1818)                                          | 4 | 3 | 2 | 2    | 4    |
| <i>Gnathia oxyuraea</i> (Lilljeborg, 1855)                                        | 2 | 3 | 1 | 2    | n.a. |
| <i>Harpinia crenulata</i> (Boeck, 1871)                                           | 2 | 3 | 3 | 3    | 3    |
| <i>Harpinia dellavallei</i> (Chevreux, 1910)                                      | 2 | 3 | 3 | 3    | 3    |
| <i>Heteromastus filiformis</i> (Claparède, 1864)                                  | 3 | 2 | 2 | 4    | 2    |
| <i>Hiatella arctica</i> (Linnaeus, 1767)                                          | 1 | 2 | 3 | 1    | 0    |
| <i>Hiatella rugosa</i> (Linnaeus, 1767)                                           | 1 | 2 | 3 | 1    | 0    |
| <i>Hilbigneris gracilis</i> (Ehlers, 1868)                                        | 4 | 3 | 3 | 2    | 3    |
| <i>Iphinoe serrata</i> (Norman, 1867)                                             | 2 | 3 | 1 | 3    | 1    |
| <i>Joeropsis brevicornis</i> (Koehler, 1885)                                      | 2 | 1 | 3 | n.a. | n.a. |
| <i>Kellia suborbicularis</i> (Montagu, 1803)                                      | 4 | 3 | 2 | 4    | 3    |
| <i>Kirkegaardia dorsobranchialis</i> (Kirkegaard, 1959)                           | 2 | 2 | 2 | 3    | 2    |
| <i>Kurtiella bidentata</i> (Montagu, 1803)                                        | 2 | 2 | 2 | 4    | 3    |
| <i>Labioleanira yhleni</i> (Malmgren, 1867)                                       | 4 | 3 | 3 | 2    | 1    |
| <i>Lagis koreni</i> (Malmgren, 1866)                                              | 3 | 1 | 3 | 3    | 2    |
| <i>Laonice cirrata</i> (M. Sars, 1851)                                            | 3 | 1 | 3 | 3    | 2    |
| <i>Lanice cochilega</i> (Pallas, 1766)                                            | 3 | 1 | 3 | 3    | 2    |
| <i>Lentidium mediterraneum</i> (O. G. Costa, 1830)                                | 2 | 2 | 1 | 1    | 1    |
| <i>Leptocheirus pectinatus</i> (Norman, 1869)                                     | 2 | 4 | 2 | 1    | n.a. |
| <i>Leptopentacta tergestina</i> (M. Sars, 1859)                                   | 2 | 3 | 1 | 1    | 1    |
| <i>Leptopentacta elongata</i> (Düben & Koren, 1846)                               | 2 | 3 | 1 | 1    | 1    |
| <i>Leptosynapta macrankyra</i> (Ludwig, 1898)                                     | 2 | 3 | 3 | 4    | n.a. |
| <i>Leucothoe pachycera</i> (Della Valle, 1893)                                    | 2 | 3 | 1 | 2    | 1    |
| <i>Leucothoe incisa</i> (Robertson, 1892)                                         | 2 | 3 | 1 | 2    | 1    |
| <i>Leucothoe lillyeborgi</i> (Boeck, 1861)                                        | 2 | 3 | 1 | 2    | 1    |
| <i>Leucothoe oboa</i> (Karaman, 1971)                                             | 2 | 3 | 1 | 2    | 1    |
| <i>Levinsenia gracilis</i> (Tauber, 1879)                                         | 2 | 3 | 2 | 3    | 1    |
| <i>Liljeborgia psaltrica</i> (Krapp-Schickel, 1975)                               | 2 | 3 | 2 | 3    | n.a. |
| <i>Liocarcinus depurator</i> (Linnaeus, 1758)                                     | 5 | 4 | 3 | 2    | n.a. |
| <i>Loripes orbiculatus</i> (Poli, 1795)                                           | 4 | 4 | 2 | 1    | 3    |
| <i>Loripinus fragilis</i> (Philippi, 1836)                                        | 4 | 3 | 2 | 1    | 3    |
| <i>Lucinella divaricata</i> (Linnaeus, 1758)                                      | 2 | 2 | 2 | 3    | 3    |
| <i>Lumbrineris latreilli</i> (japonica Marenzeller, 1879)                         | 4 | 3 | 3 | 4    | 3    |
| <i>Lumbrineris luciliae</i> (Martins, Carrera-Parra, Quintino & Rodrigues, 2012)  | 4 | 3 | 3 | 4    | 3    |

|                                                                                    |   |   |   |   |      |
|------------------------------------------------------------------------------------|---|---|---|---|------|
| <i>Lumbrineris lusitanica</i> (Martins, Carrera-Parra, Quintino & Rodrigues, 2012) | 4 | 3 | 3 | 4 | 3    |
| <i>Lumbrineris nonatoi</i> (Ramos, 1976)                                           | 4 | 3 | 3 | 4 | 3    |
| <i>Lygdamis muratus</i> (Allen, 1904)                                              | 1 | 1 | 3 | 1 | n.a. |
| <i>Lysianella dellavallei</i> (Stebbing, 1906)                                     | 3 | 2 | 2 | 3 | n.a. |
| <i>Lysidice unicornis</i> (Grube, 1840)                                            | 4 | 3 | 3 | 3 | n.a. |
| <i>Maera grossimana</i> (Montagu, 1808)                                            | 2 | 3 | 1 | 3 | n.a. |
| <i>Maera sodalis</i> (Karaman & Ruffo, 1971)                                       | 2 | 3 | 1 | 3 | n.a. |
| <i>Magelona rosea</i> (Moore, 1907)                                                | 2 | 2 | 3 | 3 | 4    |
| <i>Magelona minuta</i> (Eliason, 1962)                                             | 2 | 2 | 3 | 3 | 4    |
| <i>Maldane glebifex</i> (Grube, 1860)                                              | 3 | 1 | 3 | 4 | 3    |
| <i>Maldane sarsi</i> (Malmgren, 1865)                                              | 3 | 1 | 3 | 4 | 3    |
| <i>Marphysa sanguinea</i> (Montagu, 1813)                                          | 4 | 3 | 3 | 4 | n.a. |
| <i>Medicorophium runcicorne</i> (Della Valle, 1893)                                | 2 | 4 | 2 | 4 | n.a. |
| <i>Medicorophium rotundirostre</i> (Stephensen, 1915)                              | 2 | 4 | 2 | 4 | n.a. |
| <i>Megastomia conoidea</i> (Brocchi, 1814)                                         | 1 | 2 | 1 | 1 | n.a. |
| <i>Melanella pseudoglabra</i> (Dautzenberg & H. Fischer, 1912)                     | 4 | 3 | 3 | 4 | n.a. |
| <i>Mellinna palmata</i> (Grube, 1870)                                              | 3 | 1 | 3 | 3 | 2    |
| <i>Microcassiope minor</i> (Dana, 1852)                                            | 5 | 4 | 3 | 1 | 0    |
| <i>Microdeutopus anomalus</i> (Rathke, 1843)                                       | 1 | 3 | 1 | 3 | 1    |
| <i>Microdeutopus versiculatus</i> (Spence Bate, 1857)                              | 1 | 3 | 1 | 3 | 1    |
| <i>Moerella distorta</i> (Poli, 1791)                                              | 2 | 2 | 2 | 3 | 3    |
| <i>Musculus subpictus</i> (Cantraine, 1835)                                        | 4 | 3 | 3 | 1 | 0    |
| <i>Myrtea spinifera</i> (Montagu, 1803)                                            | 2 | 2 | 2 | 1 | 3    |
| <i>Mysia undata</i> (Pennant, 1777)                                                | 2 | 2 | 3 | 1 | 3    |
| <i>Mystra picta</i> (Quatrefages, 1866)                                            | 4 | 3 | 2 | 2 | 3    |
| <i>Neanthes fucata</i> (Savigny, 1822)                                             | 4 | 4 | 2 | 2 | 4    |
| <i>Nepinnotheres pinnotheres</i> (Linnaeus, 1758)                                  | 2 | 2 | 2 | 1 | 0    |
| <i>Nephtys hystericis</i> (McIntosh, 1900)                                         | 4 | 3 | 2 | 2 | 1    |
| <i>Nereis lamellosa</i> (Ehlers, 1868)                                             | 4 | 4 | 2 | 2 | 4    |
| <i>Nereis rava</i> (Ehlers, 1868)                                                  | 4 | 4 | 2 | 2 | 4    |
| <i>Notomastus aberans</i> (Day, 1957)                                              | 3 | 2 | 3 | 3 | 4    |
| <i>Notomastus latericeus</i> (Sars, 1851)                                          | 3 | 2 | 3 | 3 | 4    |
| <i>Nucula nitidosa</i> (Winckworth, 1930)                                          | 2 | 3 | 3 | 3 | 1    |
| <i>Nucula nucleus</i> (Linnaeus, 1758)                                             | 2 | 3 | 3 | 3 | 1    |
| <i>Oestergrenia digitata</i> (Montagu, 1815)                                       | 2 | 3 | 3 | 4 | n.a. |
| <i>Ondina dilucida</i> (Monterosato, 1884)                                         | 1 | 2 | 1 | 3 | n.a. |
| <i>Ophiothrix quinquemaculata</i> (Delle Chiaje, 1828)                             | 2 | 2 | 3 | 3 | 1    |
| <i>Ophiothrix fragilis</i> (Abildgaard in O.F. Müller, 1789)                       | 2 | 2 | 3 | 3 | 1    |
| <i>Ophiura albida</i> (Forbes, 1839)                                               | 2 | 2 | 1 | 3 | 1    |
| <i>Ophiura grubei</i> (Heller, 1863)                                               | 2 | 2 | 1 | 3 | 1    |
| <i>Ophiura ophiura</i> (Linnaeus, 1758)                                            | 2 | 2 | 1 | 3 | 1    |
| <i>Orchomene humilis</i> (Costa, 1853)                                             | 2 | 3 | 2 | 3 | n.a. |
| <i>Ova canaliferus</i> (Lamarck, 1816)                                             | 4 | 2 | 3 | 4 | 2    |
| <i>Owenia fusiformis</i> (Delle Chiaje, 1844)                                      | 2 | 1 | 3 | 3 | 1    |

|                                                                             |   |   |      |      |      |
|-----------------------------------------------------------------------------|---|---|------|------|------|
| <i>Paguristes eremita</i> (Linnaeus, 1767)                                  | 1 | 4 | 1    | 2    | 0    |
| <i>Pagurus prideaux</i> (Leach, 1815)                                       | 1 | 4 | 1    | 2    | 0    |
| <i>Pandora inaequalvis</i> (Linnaeus, 1758)                                 | 4 | 3 | 3    | 3    | n.a. |
| <i>Papillicardium papillosum</i> (Poli, 1791)                               | 4 | 3 | 3    | 1    | 2    |
| <i>Paragnathia formica</i> (Hesse, 1864)                                    | 2 | 3 | n.a. | n.a. | n.a. |
| <i>Paralysianopsis parthenopeia</i> (Ruffo, 1971)                           | 2 | 1 | 2    | 3    | n.a. |
| <i>Parthenopoides massena</i> (Roux, 1830)                                  | 2 | 2 | 3    | 2    | 1    |
| <i>Parvicardium exiguum</i> (Gmelin, 1791)                                  | 2 | 2 | 1    | 1    | 1    |
| <i>Parvicardium scabrum</i> (Philippi, 1844)                                | 2 | 2 | 1    | 1    | 1    |
| <i>Paucibranchia bellii</i> (Audouin & Milne Edwards, 1833)                 | 4 | 3 | 3    | 4    | n.a. |
| <i>Pectinaria</i> ( <i>Amphictene</i> ) <i>auricoma</i> (O.F. Müller, 1776) | 3 | 1 | 3    | 3    | 3    |
| <i>Peronidia albicans</i> (Gmelin, 1791)                                    | 2 | 2 | 2    | 3    | 3    |
| <i>Phascolosoma granulatum</i> (Leuckart, 1828)                             | 4 | 3 | 1    | 3    | n.a. |
| <i>Phaxas adriaticus</i> (Coen, 1933)                                       | 2 | 2 | 3    | 1    | 1    |
| <i>Pherusa monilifera</i> (Delle Chiaje, 1841)                              | 3 | 2 | 3    | 3    | n.a. |
| <i>Philocheras monacanthus</i> (Holthuis, 1961)                             | 2 | 4 | 3    | 2    | n.a. |
| <i>Phtisica marina</i> (Slabber, 1769)                                      | 2 | 2 | 2    | 3    | n.a. |
| <i>Phyllophorus urna</i> (Grube, 1840)                                      | 4 | 3 | 1    | 3    | n.a. |
| <i>Phylo foetida</i> (Claparède, 1868)                                      | 1 | 3 | 3    | 2    | n.a. |
| <i>Pilargis verrucosa</i> (Saint-Joseph, 1899)                              | 4 | 3 | 2    | 2    | n.a. |
| <i>Pilumnus hirtellus</i> (Linnaeus, 1761)                                  | 2 | 3 | 3    | 2    | n.a. |
| <i>Pilumnus minutus</i> (De Haan, 1835)                                     | 2 | 3 | 3    | 2    | n.a. |
| <i>Piromis eruca</i> (Claparède, 1869)                                      | 4 | 4 | 3    | 3    | n.a. |
| <i>Pisidia bluteli</i> (Risso, 1816)                                        | 1 | 3 | 1    | 2    | n.a. |
| <i>Pista lornensis</i> (Pearson, 1969)                                      | 3 | 1 | 3    | 1    | 2    |
| <i>Pitar rudis</i> (Poli, 1795)                                             | 1 | 4 | 1    | 1    | 1    |
| <i>Poecilochaetus fauchaldi</i> (Pilato & Cantone, 1976)                    | 2 | 2 | 2    | 3    | 1    |
| <i>Polititapes aureus</i> (Gmelin, 1791)                                    | 2 | 2 | 3    | 1    | 2    |
| <i>Polycirrus auranticus</i> (Grube, 1860)                                  | 3 | 1 | 3    | 1    | 2    |
| <i>Polydora ciliata</i> (Johnston, 1838)                                    | 3 | 1 | 1    | 1    | 2    |
| <i>Prionospio cirrifera</i> (Wirén, 1883)                                   | 3 | 2 | 3    | 3    | 2    |
| <i>Prionospio multibranchiata</i> (Berkeley, 1927)                          | 3 | 2 | 3    | 3    | 2    |
| <i>Processa macrophthalma</i> (Nouvel & Holthuis, 1957)                     | 1 | 4 | 1    | 2    | 1    |
| <i>Protodorvillea kefersteini</i> (McIntosh, 1869)                          | 4 | 3 | 1    | 2    | 1    |
| <i>Psammechinus microtuberculatus</i> (Blainville, 1825)                    | 1 | 3 | 1    | 2    | 0    |
| <i>Pseudoleiocardia fauveli</i> (Harmelin, 1964)                            | 3 | 2 | 2    | 4    | 2    |
| <i>Pseudolirius kroyeri</i> (Haller, 1879)                                  | 4 | 1 | 3    | 3    | 3    |
| <i>Rocellaria dubia</i> (Pennant, 1777)                                     | 4 | 3 | 3    | 1    | 0    |
| <i>Sabella pavonina</i> (Savigny, 1822)                                     | 2 | 1 | 1    | 1    | 1    |
| <i>Saxicavella jeffreysi</i> (Winckworth, 1930)                             | 1 | 2 | 3    | 1    | n.a. |
| <i>Scalibregma inflatum</i> (Rathke, 1843)                                  | 4 | 4 | 2    | 3    | 3    |
| <i>Schistomeringos rudolphi</i> (Delle Chiaje, 1828)                        | 4 | 3 | 1    | 2    | 1    |
| <i>Sclerocheilus minutus</i> (Grube, 1863)                                  | 2 | 4 | 3    | 4    | 3    |
| <i>Scoletoma emandibulata mabiti</i> (Ramos, 1976)                          | 4 | 3 | 3    | 3    | 3    |

|                                                      |   |   |   |   |      |
|------------------------------------------------------|---|---|---|---|------|
| <i>Scoletoma laurentiana</i> (Grube, 1863)           | 4 | 3 | 3 | 3 | 3    |
| <i>Scrobicularia plana</i> (da Costa, 1778)          | 2 | 2 | 1 | 1 | 2    |
| <i>Serpula vermicularis</i> (Linnaeus, 1767)         | 2 | 1 | 3 | 1 | 0    |
| <i>Serratina serrata</i> (Brocchi, 1814)             | 4 | 3 | 3 | 3 | 3    |
| <i>Sicyonia carinata</i> (Brünnich, 1768)            | 2 | 3 | 3 | 2 | 0    |
| <i>Sigambra tentaculata</i> (Treadwell, 1941)        | 4 | 3 | 3 | 2 | n.a. |
| <i>Solemya togata</i> (Poli, 1791)                   | 4 | 3 | 3 | 1 | n.a. |
| <i>Spiochaetopterus costarum</i> (Claparède, 1869)   | 3 | 1 | 3 | 1 | 4    |
| <i>Spiophanes bombyx</i> (Claparède, 1870)           | 3 | 1 | 3 | 3 | 4    |
| <i>Spirobranchus triqueter</i> (Linnaeus, 1758)      | 1 | 1 | 3 | 1 | 0    |
| <i>Spisula subtruncata</i> (da Costa, 1778)          | 2 | 2 | 1 | 1 | 2    |
| <i>Squilla mantis</i> (Linnaeus, 1758)               | 4 | 4 | 2 | 2 | 1    |
| <i>Sternaspis scutata</i> (Ranzani, 1817)            | 4 | 3 | 3 | 4 | 3    |
| <i>Sthenelais limicola</i> (Ehlers, 1864)            | 4 | 3 | 1 | 2 | 1    |
| <i>Striarca lactea</i> (Linnaeus, 1758)              | 4 | 3 | 3 | 1 | n.a. |
| <i>Tellinomya ferruginosa</i> (Montagu, 1808)        | 2 | 2 | 3 | 4 | 4    |
| <i>Terebellides stroemii</i> (Sars, 1835)            | 3 | 1 | 3 | 1 | 2    |
| <i>Therochaeta flabellata</i> (Sars in Sars, 1872)   | 2 | 3 | 3 | 3 | 1    |
| <i>Thyone fusus</i> (O.F. Müller, 1776)              | 2 | 3 | 1 | 3 | n.a. |
| <i>Thysanocardia catharinae</i> (Grube, 1868)        | 4 | 3 | 1 | 3 | n.a. |
| <i>Timoclea ovata</i> (Pennant, 1777)                | 2 | 2 | 1 | 1 | 1    |
| <i>Tritia incrassata</i> (Strøm, 1768)               | 2 | 3 | 1 | 2 | 1    |
| <i>Tritia mutabilis</i> (Linnaeus, 1758)             | 2 | 3 | 1 | 2 | 1    |
| <i>Tritia reticulata</i> (Linnaeus, 1758)            | 2 | 3 | 1 | 2 | 1    |
| <i>Tritia varicosa</i> (W. Turton, 1825)             | 2 | 3 | 1 | 2 | 1    |
| <i>Turritellinella tricarinata</i> (Brocchi, 1814)   | 4 | 3 | 1 | 1 | 1    |
| <i>Upogebia deltaura</i> (Leach, 1816)               | 3 | 4 | 2 | 4 | 4    |
| <i>Varicorbula gibba</i> (Olivi, 1792)               | 2 | 2 | 1 | 1 | 1    |
| <i>Virgularia mirabilis</i> (Müller, 1776)           | 2 | 2 | 1 | 1 | 1    |
| <i>Websterinereis glauca</i> (Claparède, 1870)       | 4 | 4 | 2 | 2 | 4    |
| <i>Westwoodilla rectirostris</i> (Della Valle, 1893) | 2 | 3 | 3 | 2 | n.a. |

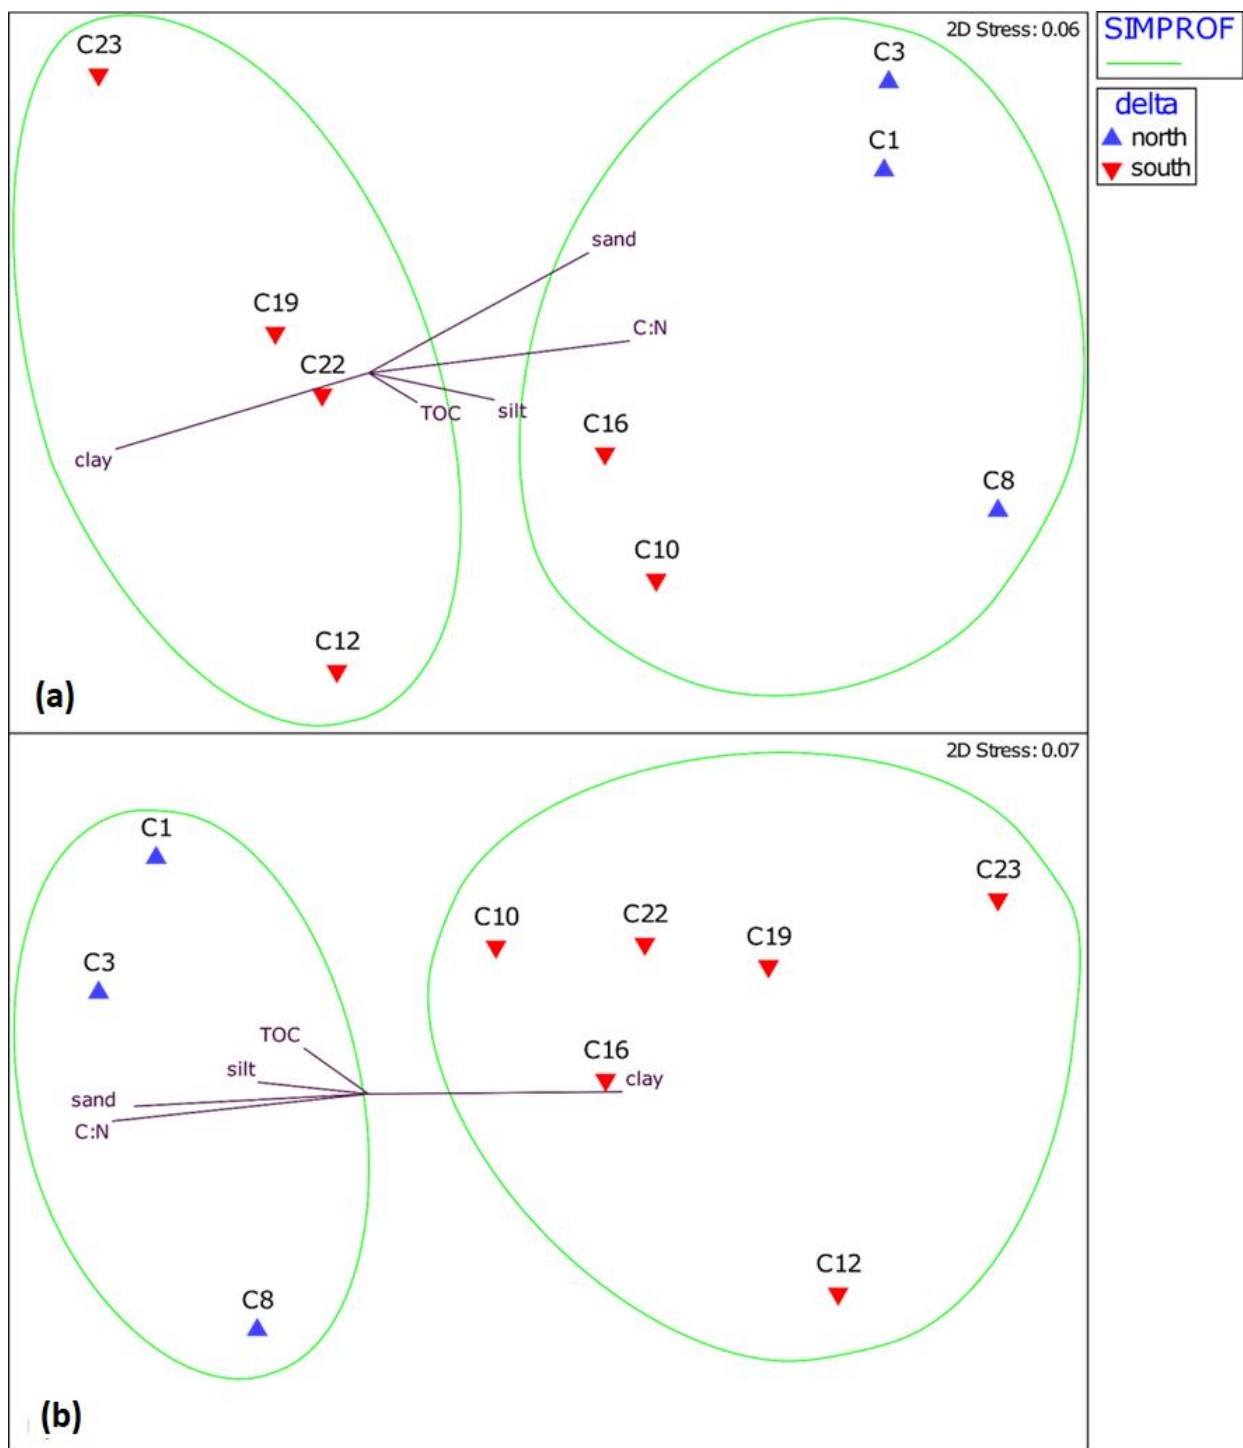

**Figure S1:** nMDS ordination plot based on BPI (a) and IPI (b) values at sampled stations in the Po River prodelta area. The significant covaried groups of stations (by SIMPROF test) are indicated. The environmental variables vectors are overlaid.



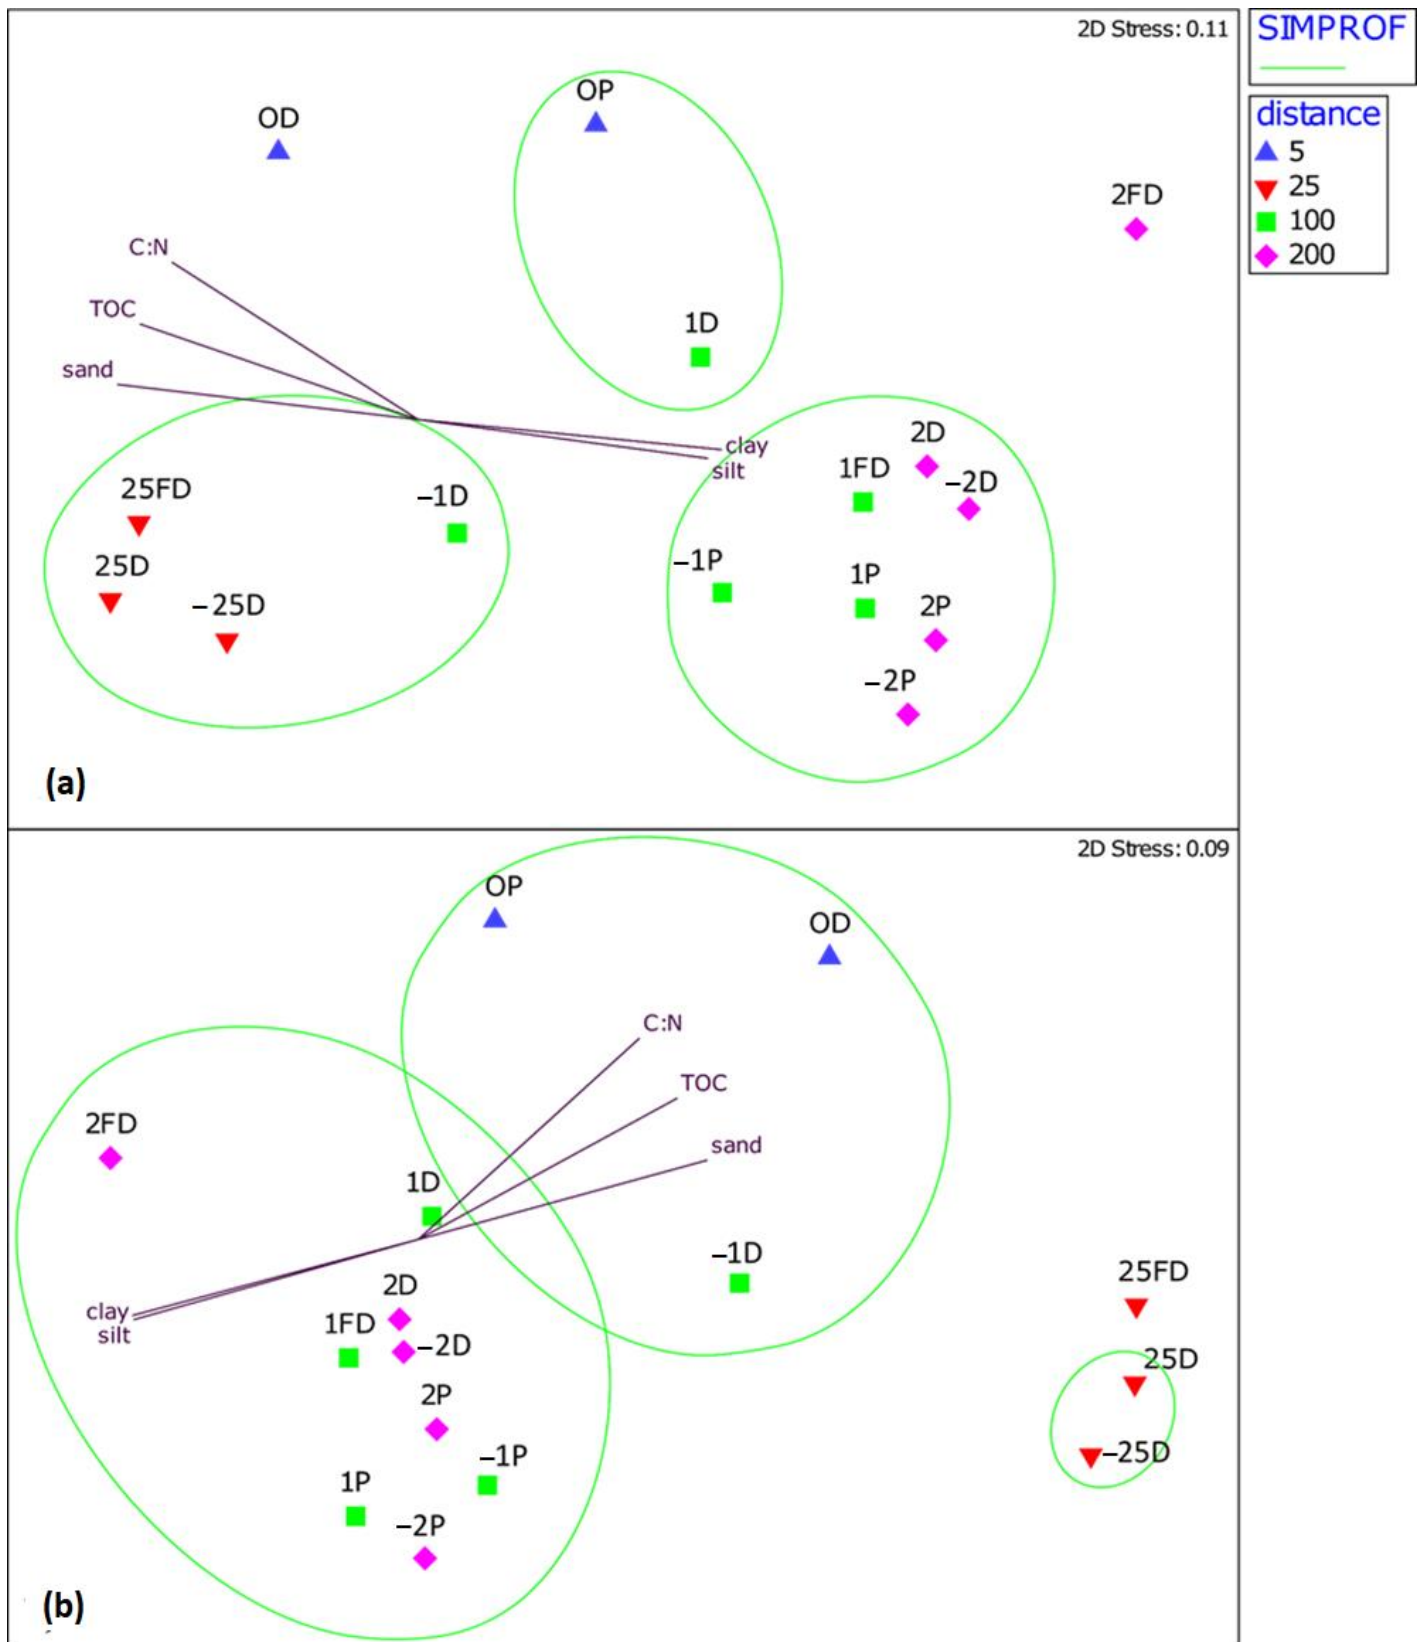

**Figure S2:** nMDS ordination plot based on BPI (a) and IPI (b) values at sampled stations nearby the diffusion zone in the Gulf of Trieste. The significant covaried groups of stations (by SIMPROF test) are indicated. The environmental variables vectors are overlaid.
